# Supplementary material for: Genome-wide analysis of 102,084 migraine cases identifies 123 risk loci and subtype-specific risk alleles
Source: PubMed Central journal article supplement (PMC8837554; doi:10.1038/s41588-021-00990-0), 2022-02-03
Supplement: 41588_2021_990_MOESM7_ESM.pdf [file 41588_2021_990_MOESM7_ESM.pdf]

**Supplementary Data 3. Forest plots of 10 variants that have been previously reported to have association with migraine but have  $P$ -value above genome-wide significance threshold ( $P > 5 \times 10^{-8}$ ) in our study (N = 873,341; 102,084 migraine cases and 771,257 controls).** For each variant, we plot the log-odds-ratio estimate (BETA) with its 95%-confidence intervals (green) from each of the five studies included in the meta-analysis and a combined beta estimate from the fixed-effect meta-analysis (blue diamond). Grey squares indicate the sample sizes of each study. We annotate each plot with the lead variant and effect allele, uncorrected two-sided  $P$ -value by the inverse-variance weighted fixed-effect meta-analysis and the heterogeneity index ( $I^2$ ).

**Study**

**BETA**

**BETA**

**95%-CI**

**rs10915437 (A), P=0.25373**

GeneRISK

HUNT

UKBB

IHGC2016

23andMe

**Fixed effect model**

$I^2 = 49\%$

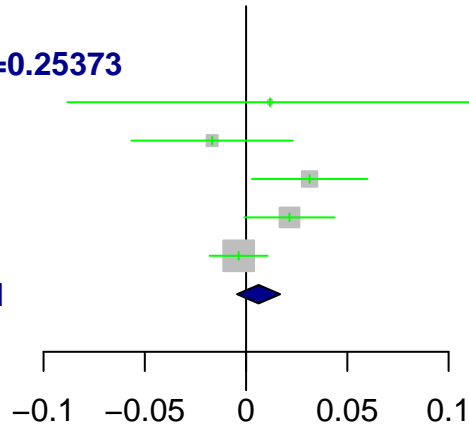

0.01 [-0.09; 0.11]

-0.02 [-0.06; 0.02]

0.03 [ 0.00; 0.06]

0.02 [ 0.00; 0.04]

-0.00 [-0.02; 0.01]

**0.01 [ 0.00; 0.02]**

-0.1 -0.05 0 0.05 0.1

**Study**

**BETA**

**BETA**

**95%-CI**

**rs2506142 (G), P=3.67e-06**

GeneRISK

HUNT

UKBB

IHGC2016

23andMe

**Fixed effect model**

$I^2 = 51\%$

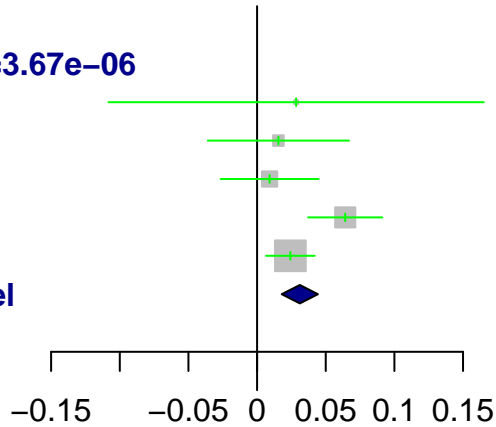

**Study**

**BETA**

**BETA**

**95%-CI**

**rs75213074 (C), P=3.5e-05**

GeneRISK

HUNT

UKBB

IHGC2016

23andMe

**Fixed effect model**

$I^2 = 41\%$

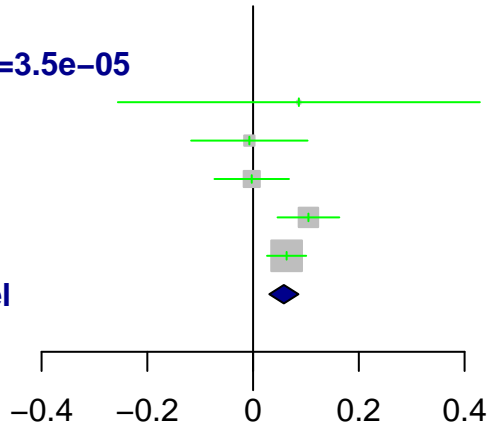

0.09 [-0.26; 0.43]

-0.01 [-0.12; 0.10]

-0.00 [-0.07; 0.07]

0.10 [0.05; 0.16]

0.06 [0.03; 0.10]

**0.06 [0.03; 0.09]**

-0.4 -0.2 0 0.2 0.4

**Study**

**BETA**

**BETA**

**95%-CI**

**rs144017103 (C), P=1.61e-05**

GeneRISK

HUNT

UKBB

IHGC2016

23andMe

**Fixed effect model**

$I^2 = 14\%$

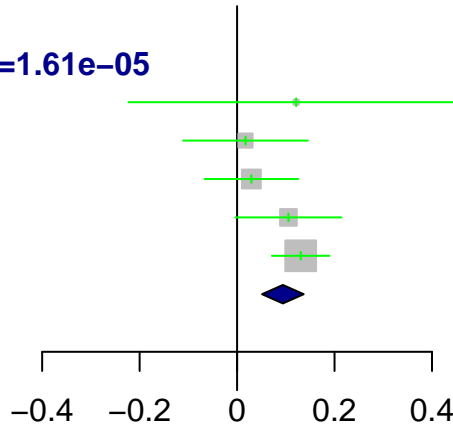

0.12 [-0.22; 0.47]

0.02 [-0.11; 0.15]

0.03 [-0.07; 0.13]

0.11 [0.00; 0.21]

0.13 [0.07; 0.19]

**0.09 [0.05; 0.14]**

**Study**

**BETA**

**BETA**

**95%-CI**

**rs1946225 (T), P=0.002371**

GeneRISK

HUNT

UKBB

IHGC2016

23andMe

**Fixed effect model**

$I^2 = 0\%$

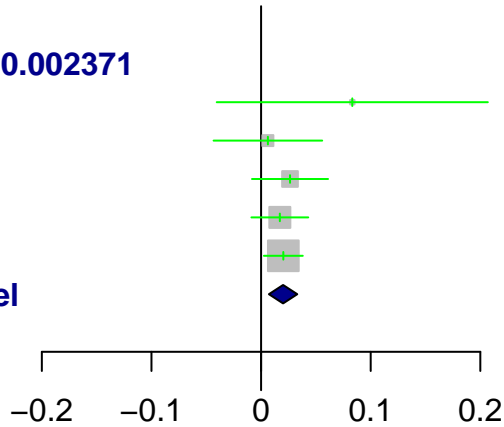

Study

BETA

BETA

95%-CI

**rs1268083 (T), P=7.86e-08**

GeneRISK

HUNT

UKBB

IHGC2016

23andMe

**Fixed effect model**

$I^2 = 81\%$

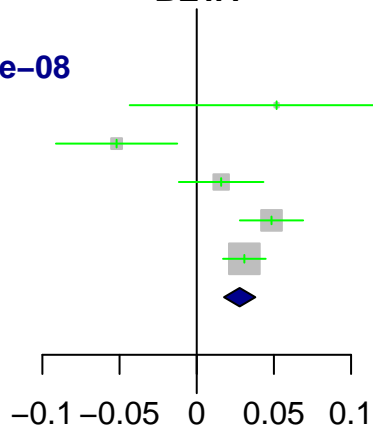

**Study**

**BETA**

**BETA**

**95%-CI**

**rs140002913 (G), P=6.38e-06**

GeneRISK

HUNT

UKBB

IHGC2016

23andMe

**Fixed effect model**

$I^2 = 69\%$

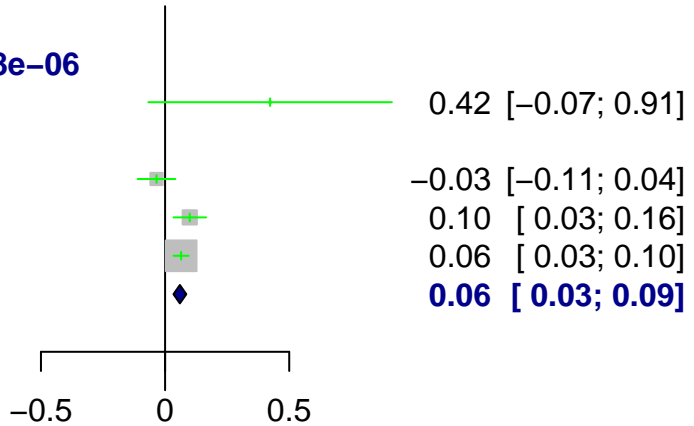



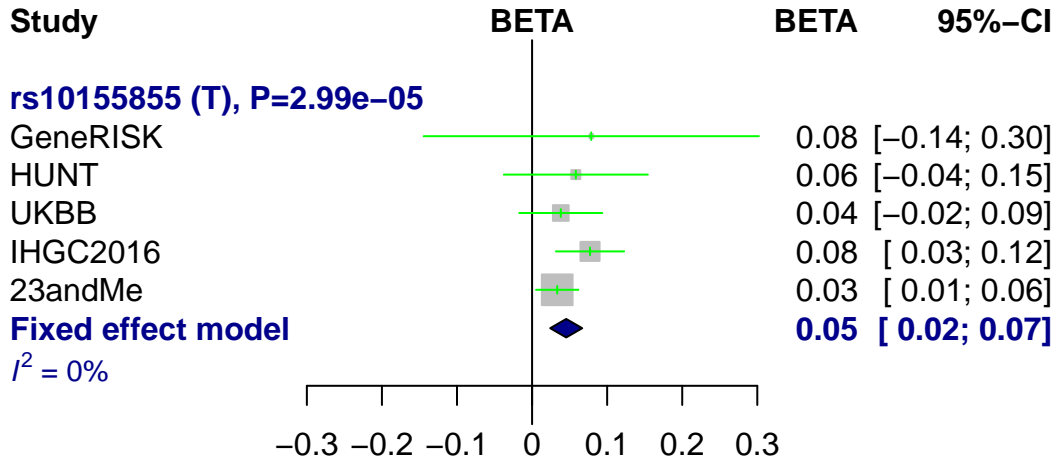

**Study**

**BETA**

**BETA**

**95%-CI**

**rs10504861 (C), P=0.143015**

GeneRISK

HUNT

UKBB

IHGC2016

23andMe

**Fixed effect model**

$I^2 = 56\%$

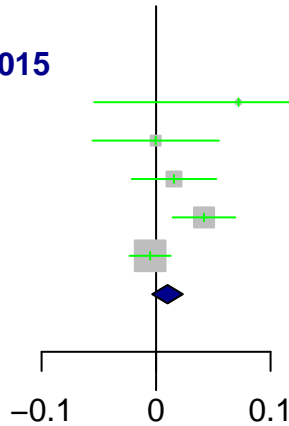

0.07 [-0.05; 0.20]

-0.00 [-0.06; 0.05]

0.02 [-0.02; 0.05]

0.04 [0.01; 0.07]

-0.01 [-0.02; 0.01]

**0.01 [0.00; 0.02]**

**Study**

**BETA**

**BETA**

**95%-CI**

**rs1835740 (T), P=0.15053**

GeneRISK

HUNT

UKBB

IHGC2016

23andMe

**Fixed effect model**

$I^2 = 0\%$

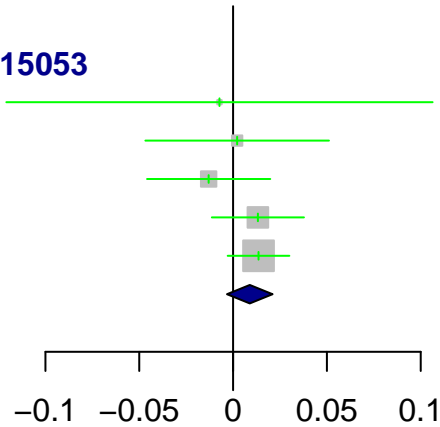

-0.01 [-0.12; 0.11]

0.00 [-0.05; 0.05]

-0.01 [-0.05; 0.02]

0.01 [-0.01; 0.04]

0.01 [ 0.00; 0.03]

**0.01 [ 0.00; 0.02]**
